# Supplementary material for: Genome-Wide Mapping of Growth-Related Quantitative Trait Loci in Orange-Spotted Grouper (Epinephelus coioides) Using Double Digest Restriction-Site Associated DNA Sequencing (ddRADseq)
Source: MDPI journal article supplement (doi:10.3390/ijms17040501), 2016-04-06
Supplement: s1 [file s1]

# Supplementary Materials: Genome-Wide Mapping of Growth-Related Quantitative Trait Loci in Orange-Spotted Grouper (*Epinephelus coioides*) Using Double Digest Restriction Site Associated DNA Sequencing (ddRADseq)

Hui Yu, Xinxin You, Jia Li, Hankui Liu, Zining Meng, Ling Xiao, Haifa Zhang, Hao-Ran Lin, Yong Zhang and Qiong Shi

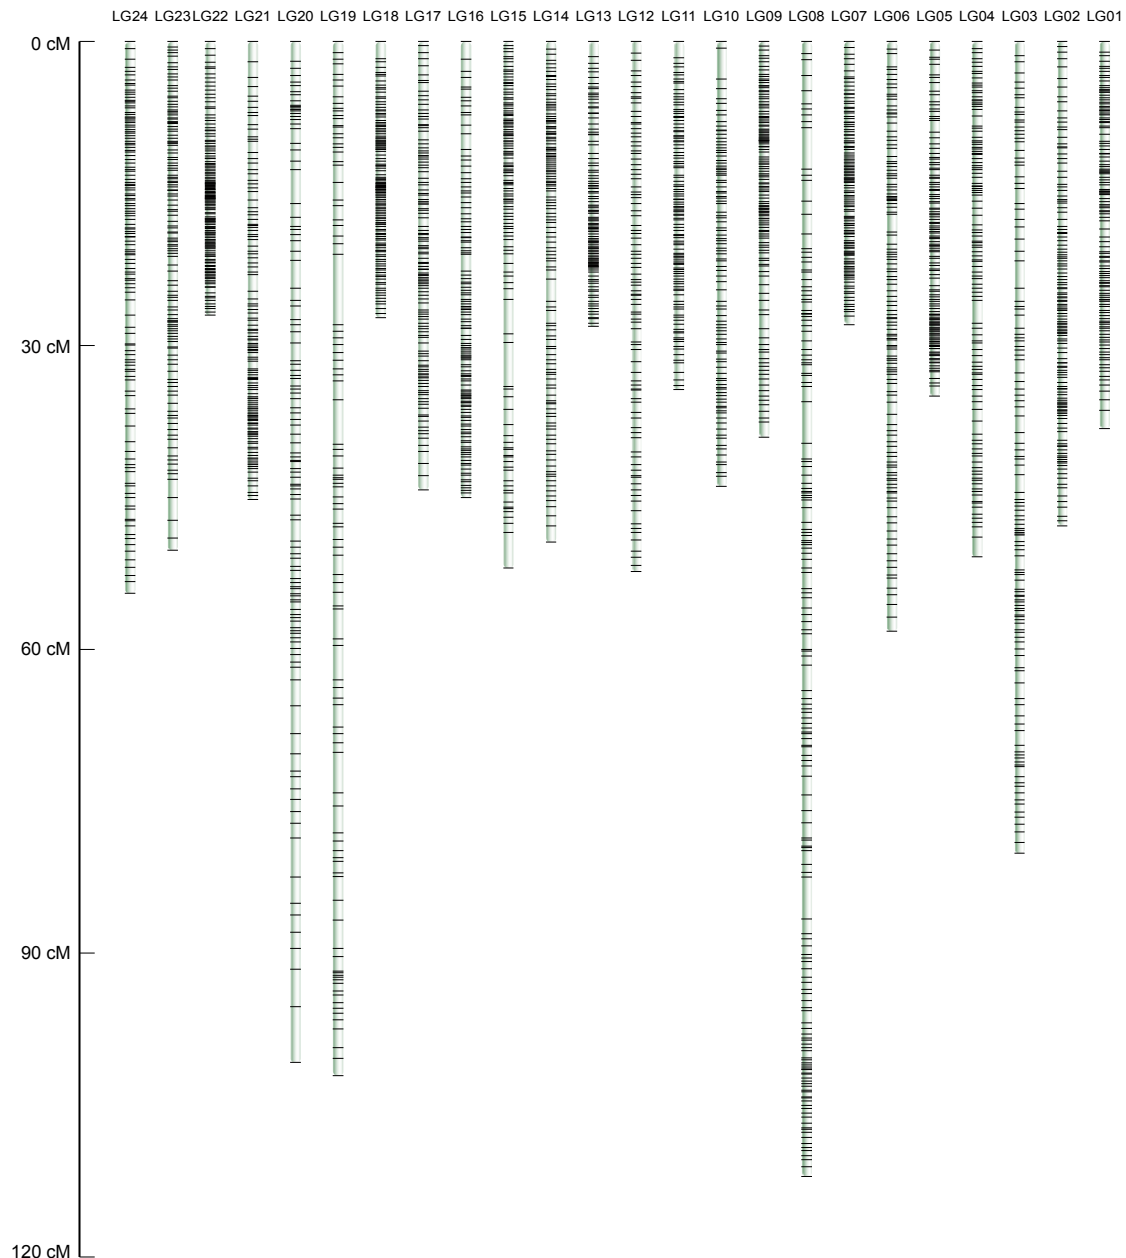

**Figure S1.** The distribution of SNPs (single-nucleotide polymorphisms) on the 24 linkage groups (LGs).

**Table S2.** The genetic linkage map of orange-spotted grouper.

| <b>Chromosome</b> | <b>Marker Number</b> | <b>Distance (cM)</b> |
|-------------------|----------------------|----------------------|
| LG1               | 131                  | 38.003               |
| LG2               | 142                  | 47.544               |
| LG3               | 128                  | 79.725               |
| LG4               | 117                  | 50.623               |
| LG5               | 130                  | 34.838               |
| LG6               | 127                  | 57.911               |
| LG7               | 121                  | 27.802               |
| LG8               | 169                  | 111.465              |
| LG9               | 133                  | 38.86                |
| LG10              | 103                  | 43.686               |
| LG11              | 116                  | 34.196               |
| LG12              | 94                   | 52.042               |
| LG13              | 115                  | 26.459               |
| LG14              | 131                  | 48.457               |
| LG15              | 123                  | 51.329               |
| LG16              | 132                  | 43.051               |
| LG17              | 127                  | 44.031               |
| LG18              | 133                  | 25.432               |
| LG19              | 103                  | 101.569              |
| LG20              | 115                  | 100.273              |
| LG21              | 129                  | 44.994               |
| LG22              | 150                  | 25.537               |
| LG23              | 130                  | 49.952               |
| LG24              | 130                  | 54.199               |
| Average           | 126                  | 51.199               |
| Total             | 3029                 | 1231.978             |

**Table S4.** The putative roles of 14 genes.

| Gene Symbol    | Gene Description                                                   | Gene ID           | Putative Role                                                                                                                             | Reference |
|----------------|--------------------------------------------------------------------|-------------------|-------------------------------------------------------------------------------------------------------------------------------------------|-----------|
| <i>wdrp91</i>  | WD repeat-containing protein 91-like                               | Eco_gene_10005999 | unreported                                                                                                                                | –         |
| <i>prrc2b</i>  | proline-rich coiled-coil 2B                                        | Eco_gene_10005555 | unknown                                                                                                                                   | [44]      |
| <i>FEZ2</i>    | fasciculation and elongation protein zeta-2-like                   | Eco_gene_10012941 | related genes to age in humans                                                                                                            | [45]      |
| <i>alg3</i>    | Dol-P-Man:Man(5)GlcNAc(2)-PP-Dol $\alpha$ -1,3-mannosyltransferase | Eco_gene_10013595 | related genes to growth, protein secretion, pigment production and sporulation in <i>Aspergillus niger</i>                                | [46]      |
| <i>ECE2</i>    | endothelin converting enzyme 2                                     | Eco_gene_10013597 | related genes to the generation of novel neuropeptides, Alzheimer's disease, the development of murine cardiac                            | [47–49]   |
| <i>ARVCF</i>   | armadillo repeat gene deleted in velocardiofacial syndrome         | Eco_gene_10014238 | related genes to neurodevelopment                                                                                                         | [50]      |
| <i>SLC27A4</i> | solute carrier family 27 (fatty acid transporter), member 4        | Eco_gene_10004531 | related to the lean percentage and loin eye area of pig                                                                                   | [51]      |
| <i>SGK223</i>  | tyrosine-protein kinase SgK223                                     | Eco_gene_10005552 | related to the signaling pathway of pancreatic ductal adenocarcinoma (PDAC) progression in humans                                         | [52]      |
| <i>CAMK2</i>   | calcium/calmodulin-dependent protein kinase 2                      | Eco_gene_10002069 | related to mitochondrial adenosine triphosphate (ATP) synthesis activity                                                                  | [53]      |
| <i>MCHR1</i>   | melanin-concentrating hormone receptor 1                           | Eco_gene_10000893 | related to the control of feeding, stress and mood                                                                                        | [54,55]   |
| <i>SARDH</i>   | sarcosine dehydrogenase                                            | Eco_gene_10005043 | related to one-carbon metabolism and cellular invasion                                                                                    | [56]      |
| <i>PAPP-A</i>  | pregnancy-associated plasma protein-A                              | Eco_gene_10018102 | related to dissolving fat, gestational diabetes mellitus, obstetric cholestasis                                                           | [57–59]   |
| <i>SYK</i>     | spleen tyrosine kinase                                             | Eco_gene_10014809 | related to proximal immunoreceptor signaling, keratinocyte terminal differentiation, the survival and migration of multiple myeloma cells | [60,61]   |
| <i>MATE1</i>   | multidrug and toxin extrusion protein 1-like                       | Eco_gene_10021611 | related to flutamide pharmacokinetics of the peripheral blood cell in the process of the liver injury development                         | [62]      |

**Table S6.** Pearson correlation coefficients for body weight and body length.

| Growth-Related Traits | No. of Progeny | Body Weight (g) | Body Length (cm) |
|-----------------------|----------------|-----------------|------------------|
| Body Weight (g)       | 68             | 1               | 0.969 **         |
| Body Length (cm)      | 68             | 0.969 **        | 1                |

\*\* : Significant correlation at 0.01 level (two-tailed).

**Table S7.** The components of 30  $\mu$ L double-digestion reaction system.

| Reagent             | Volume ( $\mu$ L) |
|---------------------|-------------------|
| DNA template        | 20                |
| Taq I *             | 1                 |
| 10X Taq I buffer    | 3                 |
| Msp I **            | 1                 |
| 10X Msp I buffer    | 3                 |
| Nuclease-free water | 1                 |

\*: 15 U/ $\mu$ L, restriction enzyme cleavage site 5' T<sup>^</sup>CGA 3' (Thermo Scientific, Waltham, MA, USA);

\*\* : 15 U/ $\mu$ L, restriction enzyme cleavage site 5' C<sup>^</sup>CGG 3' (Thermo Scientific, Waltham, MA, USA).

**Table S8.** The components of 40  $\mu$ L ligation reaction system.

| Reagent                  | Volume ( $\mu$ L) |
|--------------------------|-------------------|
| enzyme-digested products | 30                |
| unique adapter           | 1                 |
| 10X Taq I buffer         | 1                 |
| 10X Msp I buffer         | 1                 |
| T4 DNA ligase            | 2                 |
| dNTP                     | 0.4               |
| ddH <sub>2</sub> O       | 4.6               |
